# Supplementary material
Source: Royal Society of Chemistry journal article supplement (doi:10.1039/d6lc00035e)
Supplement: d6lc00035e1.pdf [file d6lc00035e1.pdf]

Supplementary Information For

## On Cloud Microfluidic Experiment Platform Powered by In-situ Maskless Lithography

Ratul Paul<sup>a</sup>, Declan Coster<sup>b</sup>, Yuwen Zhao<sup>c</sup>, Yi Liu<sup>d</sup>, and Yaling Liu<sup>a, c, e, \*</sup>

<sup>a</sup>Department of Mechanical Engineering and Mechanics, Lehigh University, Bethlehem, Pennsylvania, USA.

<sup>b</sup>Department of Electrical and Computer Engineering, Lehigh University, Bethlehem, Pennsylvania, USA.

<sup>c</sup>Department of Bioengineering, Lehigh University, Bethlehem, Pennsylvania, USA.

<sup>d</sup>Dali University, School of Engineering, Dali, Yunnan, China.

<sup>e</sup>West China Hospital of Sichuan University, Bioengineering Program, Chengdu, China

### Experimental Setup

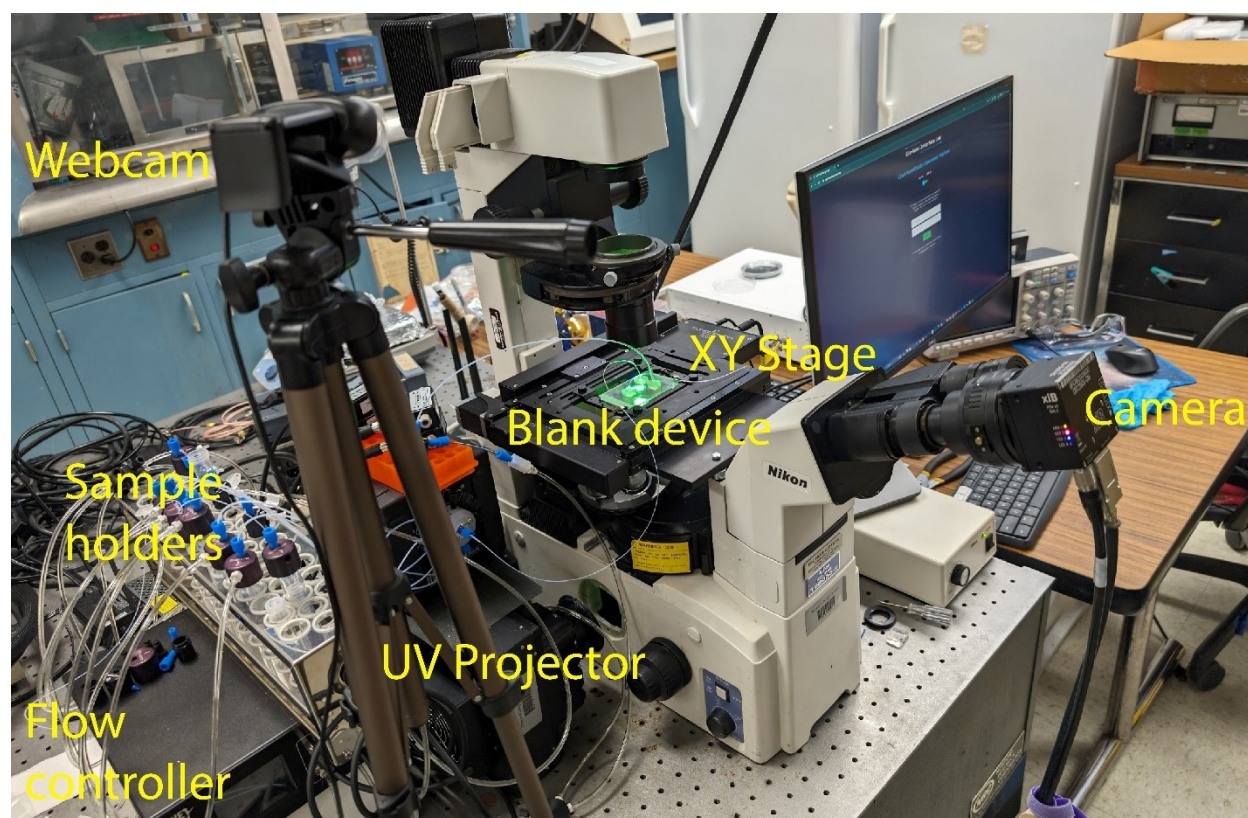

Figure S1: Experimental Setup for the online microfluidic experimental platform.

## Blank Device

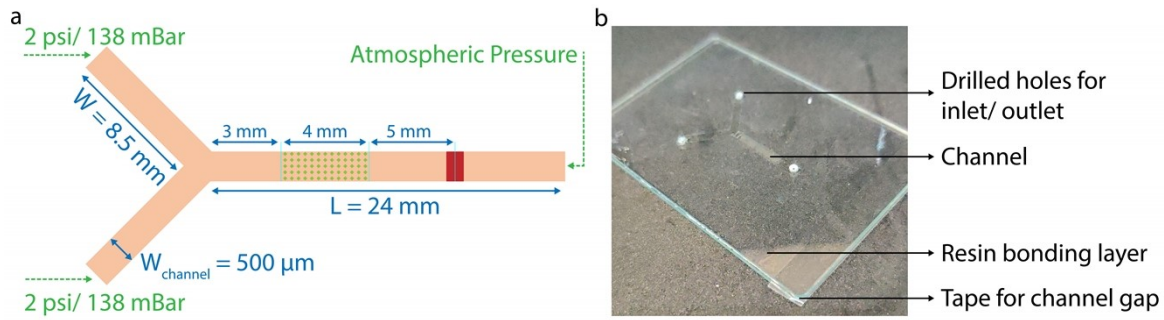

Figure S2: (a) A graphical problem statement that was presented to the students as a part of the BIOE247 course project. (b) Actual fabricated blank device as demonstration

## User Interface

Supplementary Figure 3-7 demonstrates the user interface of the platform.

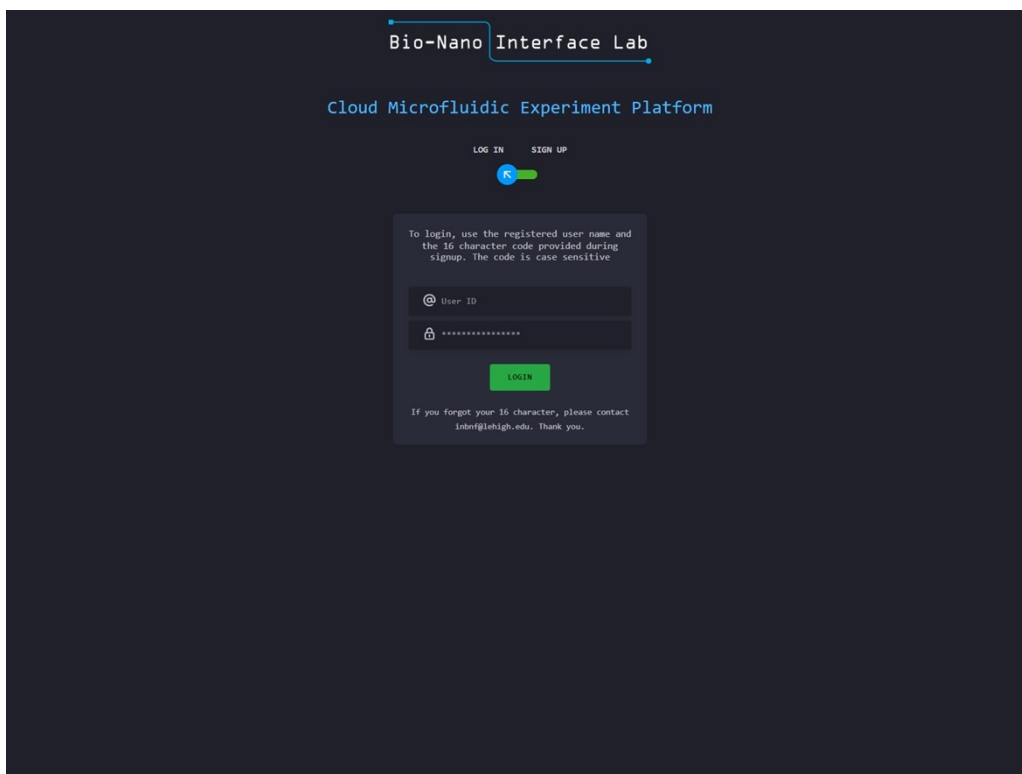

Figure S3: Signup and login page.

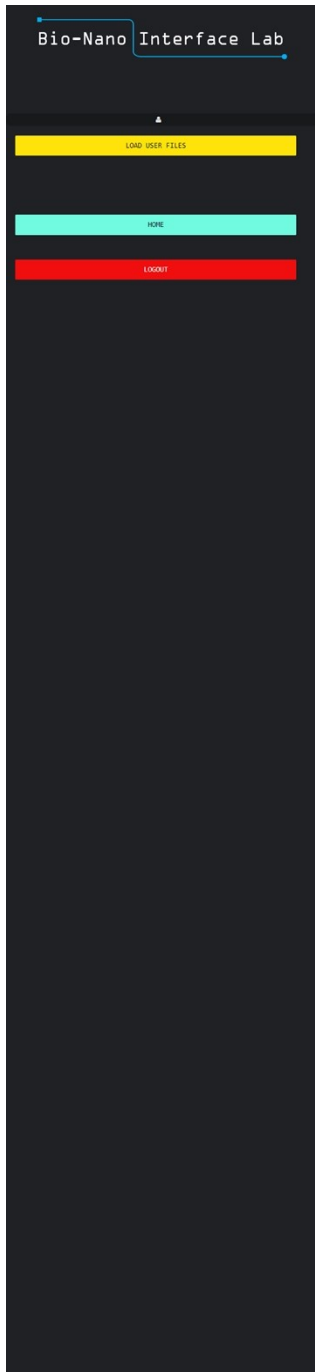

Welcome to the Bio Nano Interface Lab's Cloud Microfluidic Experiment Platform at Lehigh University

Use standard patterns for simple shapes with defined size (in micrometers), array size and gap. The array size can be any integer as long as the total size of the patterns does not exceed the size of the blank channel. Use rows=1 and columns=1 to print a single pattern.

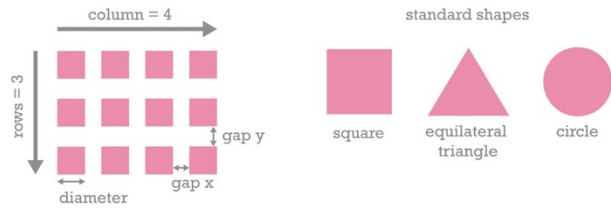

FABRICATE WITH PRE-DEFINED PATTERNS

Rows:

Columns:

Diameter:

Gap:

Shape

- Triangle
- Square
- Circle

Define standard shapes, number of row and cloumn, size and gap

Use pictures (transparent .png file) for simple user devined shapes with defined size, array size and gap. The array size can be any integer as long as the total size of the patterns does not exceed the size of the blank channel. Use rows=1 and columns=1 to print a single pattern. The diameter represents the size of the largest dimension (in micrometers).

Note: if the patterns are projecting as rectangles and not the user defined shape, please check if the background of the png file is transparent or not.

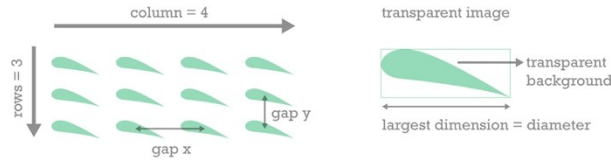

FABRICATE WITH PNG IMAGE

Rows:

Columns:

Diameter:

Gap:

No file chosen

Define shape by image, number of row and cloumn, size and gap

Use a DXF file for more complicated patterns. DXF file can be used when non discrete patterns such as a full microfluidic channel needs to be fabricated. The dimension in the dxf file needs to be in micrometers.

Note: fabrication with a DXF file currently requires admin approval, so please send the drawing file to inbnf@lehigh.edu with your id name.

FABRICATE WITH DXF FILE

No file chosen

Upload .dxf file

Figure S4: The input page contains several mode of patterning. Users can choose from standard shapes, or upload image file or upload .dxf file.

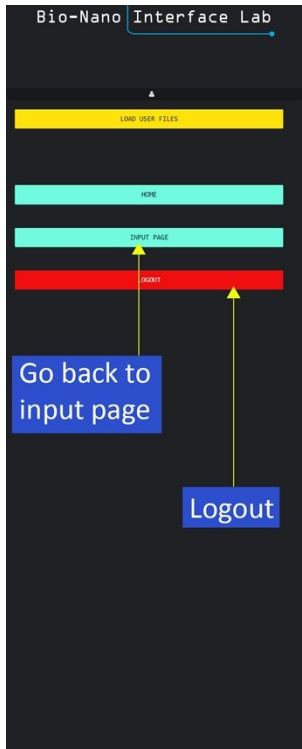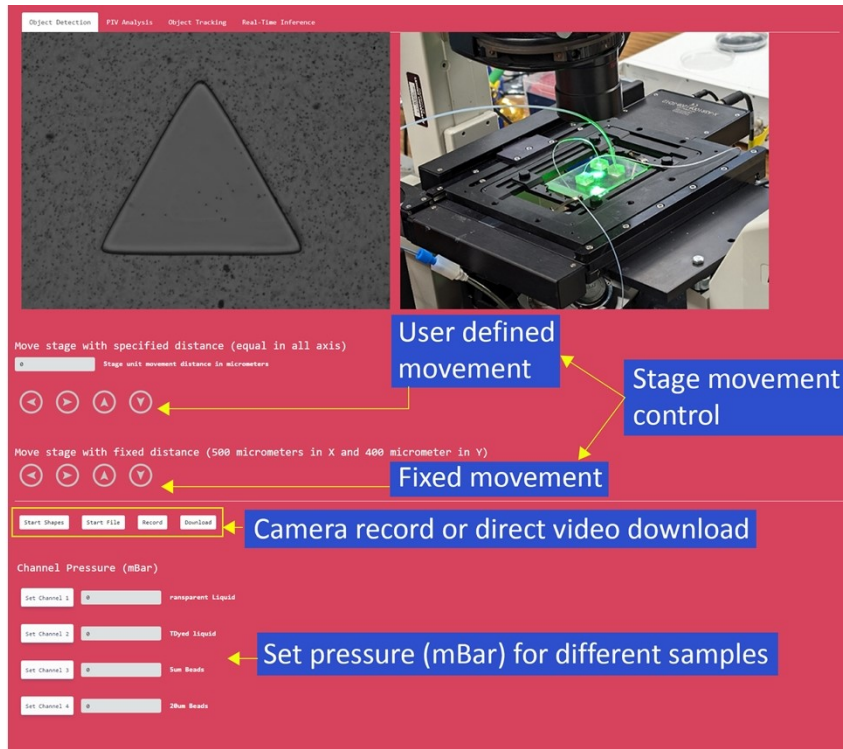

Figure S5: The fabrication and tools page contains the camera control, stage control, and sample control.

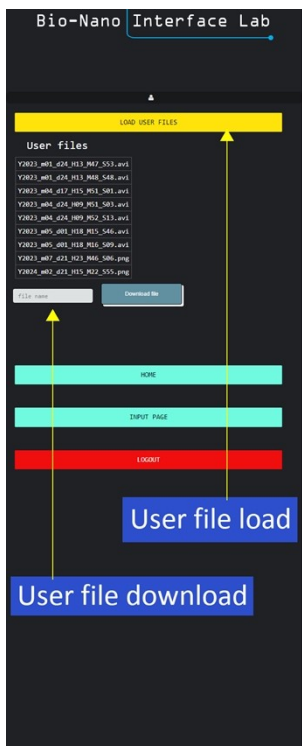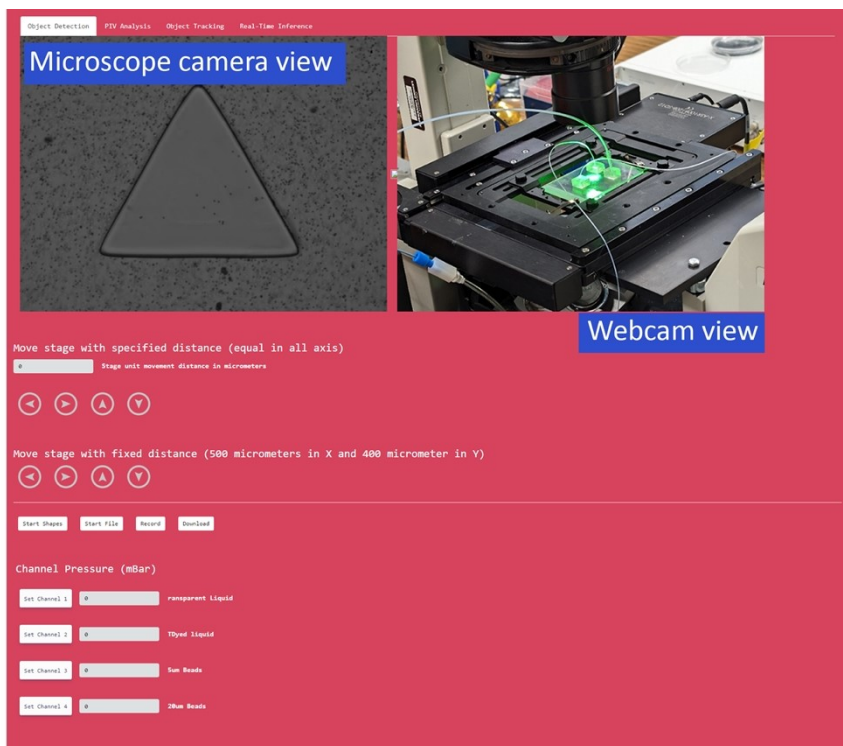

Figure S6: The user can manage files in their account from the side dashboard.

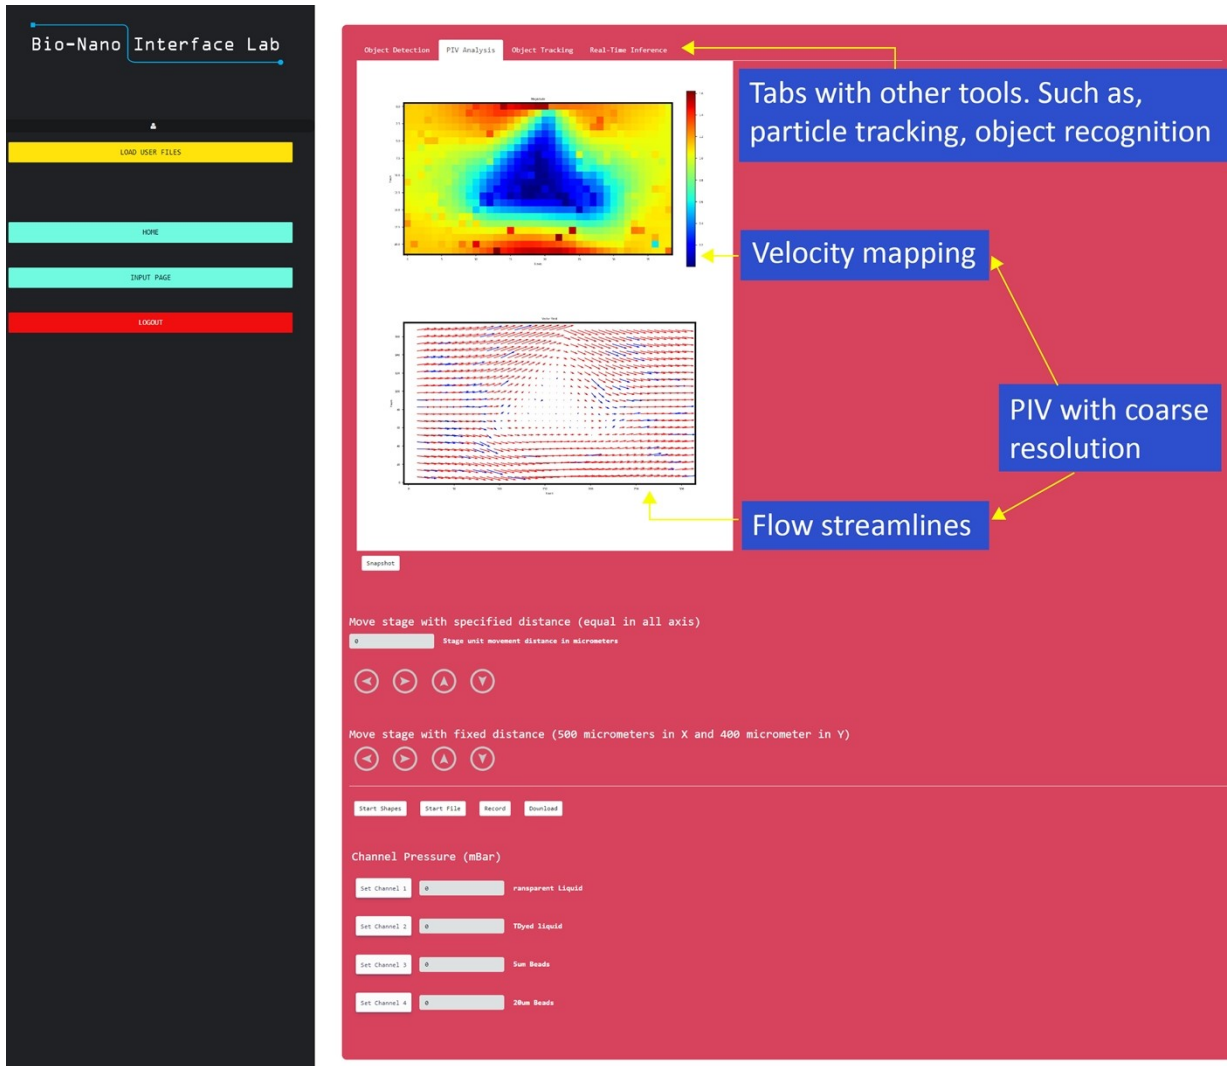

Figure S7: Users can choose from different built-in tools in this page.

### User Feedback

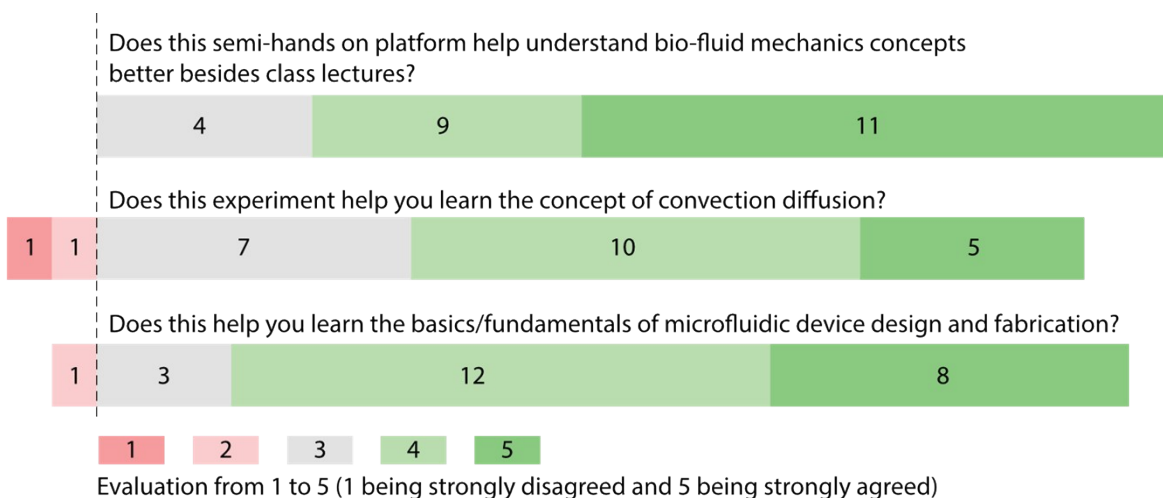

Figure S8: Feedback on the cloud microfluidic experiment platform from the students in the BIOE247 course.

Table S1: Student comments and suggestions after using the cloud microfluidic experiment platform for the course project.

| Positive comments                                                                                                                  | Suggestions                                                                                                                                                                                              | Category                          |
|------------------------------------------------------------------------------------------------------------------------------------|----------------------------------------------------------------------------------------------------------------------------------------------------------------------------------------------------------|-----------------------------------|
| I would've liked to create more designs in real life to see which ones had the best mixing.                                        | Continue making the user interface as friendly as possible.<br>The procedure can be modified to be easier to follow.                                                                                     | Improving the interface           |
| I thought it was relatively simple to work with, maybe a bit more instruction directly on the platform could be helpful.           | Maybe on the arrows to move the camera, put coordinates (i.e., +X, -X, +Y, -Y).<br>I think there should be x and y axis markers so that you know which way you are moving with the arrows at the bottom. |                                   |
| I really liked this portion of the project and would have like more time to try different patterns.                                |                                                                                                                                                                                                          |                                   |
| I thought the project was a fun and interesting one. It was a great way to gain a better understanding of fluid mechanics.         | The platform is a little confusing for students that have never worked with microfluidics. It would be nice to get a little practice with it before starting the project.                                | More time to get accustomed       |
| In order to make it more impactful, make groups smaller as not everyone in group was able to work on it, and it seemed really fun. | Maybe we could have been given a bit more time to complete the project.                                                                                                                                  |                                   |
| This was a very good project. No further suggestions needed.                                                                       | Maybe do something like this in lab.<br>More interactive experiment.                                                                                                                                     | Prefers a more in-lab experience  |
|                                                                                                                                    | Make the students aware of design considerations so that they have a better idea of if the machine will be able to correctly fabricate their design.                                                     | Needs more emphasis on the theory |

Table S2: Student understanding on what else this platform can be used for microfluidic experiments.

- 
- 
- I think we can run tests that are more geared towards turbulent flow with this platform.
  - Changing other properties and seeing how mixing is affected.
  - Tests for larger mixing devices potentially.
  - Maybe this kind of platform could also be used to look at how changing flow rates can impact different fluid properties.
  - The mixing of multiple fluids instead of just two
  - It would be interesting to test flow through a porous membrane.
  - To see if certain fluid properties affect mixing under the same conditions.
  - I think you could do diffusion tests and more tests on the flow of different materials.
  - The diffusion of more than two fluids
  - To be honest I have no idea.
  - Cell mixing and diffusion.
  - Any simulation of fluidic properties can be run on COMSOL.
  - Possibly other types of mixing (like the membrane diffusion mixing)
  - You could test scaled down models using microfluidics or tests for fluid dynamics around objects.
  - I am unsure.
  - Another suggestion might be to include running a test that includes further statistical analysis to accept or reject the hypothesis that effective mixing has occurred.
- 
-

Table S3: A summary and comparison of similar research.

| Study                           | Main focus                                                                  | Design on web/cloud | Remote experiment execution | Remote fabrication | Real experimental data collection | Main educational/research scope                               | Key distinction from the present work                                                                                                                                                |
|---------------------------------|-----------------------------------------------------------------------------|---------------------|-----------------------------|--------------------|-----------------------------------|---------------------------------------------------------------|--------------------------------------------------------------------------------------------------------------------------------------------------------------------------------------|
| Zhang et al., <sup>1</sup>      | Open-source interactive design platform for 3D-printed microfluidic devices | Yes                 | No                          | No                 | No                                | Design automation for 3D-printed microfluidics                | Enables browser-based design and DFM, but not remote physical experiments.                                                                                                           |
| Wietsma et al., <sup>2</sup>    | Classroom lab-on-a-chip kit and student-fabricated devices                  | No                  | No                          | No                 | Yes, in the classroom             | Hands-on school/university microfluidics education            | Strong in-class learning, but experiments are local classroom practicals, not cloud-accessed.                                                                                        |
| De Micheli et al., <sup>3</sup> | Mixed reality for enhanced microfluidics laboratory course                  | No                  | No                          | No                 | Supports existing lab course      | Visualization and conceptual learning                         | Enhances understanding of microfluidic phenomena, but does not provide remote fabrication or online experimentation.                                                                 |
| Delgado et al., <sup>4</sup>    | Economical in-class sticker microfluidic activity                           | No                  | No                          | No                 | Yes, in class                     | Low-cost hands-on device manufacturing and microscale physics | Affordable and portable in-class activity, but not internet-enabled or remotely operated.                                                                                            |
| Sano et al., <sup>5</sup>       | Internet-enabled LoC technology for education                               | Yes                 | Yes                         | No                 | Yes                               | Remote programming education using cloud-integrated LoCs      | Closest prior work in remote access, but centered on open-loop educational assay execution rather than a general platform for remote fabrication, experimentation, imaging/analysis. |
| This study                      | Cloud microfluidic experiment platform                                      | Yes                 | Yes                         | Yes                | Yes                               | Education and research                                        | Integrates remote in-situ fabrication, experiment control, imaging, and server-side analysis in one platform.                                                                        |

Table S4: Step-by-Step Implementation Guide for a Cloud-Accessible Microfluidic Experiment Platform

| Objective                                            | Instruments / Tools Used in This Study                                                                                       | Notes                                                                                                                                                                                                                              |
|------------------------------------------------------|------------------------------------------------------------------------------------------------------------------------------|------------------------------------------------------------------------------------------------------------------------------------------------------------------------------------------------------------------------------------|
| Establish an experimental imaging system             | Inverted microscope (Nikon Ti-series) and Ximea high-speed color camera                                                      | Any microscope-camera system capable of imaging microfluidic channels can be used. In this case, the camera port was used for the UV maskless lithography, and one of the eyepieces was used for imaging through a camera adapter. |
| Integrate the flow control system                    | Elveflow OB1 pressure controller with MUX distribution valve                                                                 | Syringe pumps or other programmable pressure controllers may also be used. But it will require a changeable reservoir. As there was only one inlet for the resin and sample, the distributor was used to control the reservoir.    |
| Enable device positioning                            | Zaber X-ASR motorized X-Y translation stage                                                                                  | Any programmable motorized stage with API support can be integrated.                                                                                                                                                               |
| Connect the hardware to the central control computer | Local workstation/server running Python-based control software                                                               | Device communication is performed through manufacturer APIs.                                                                                                                                                                       |
| Implement central control software                   | Python scripts integrating stage control, camera acquisition, and pressure control APIs                                      | Other environments, such as MATLAB or LabVIEW, could also be used                                                                                                                                                                  |
| Develop a user interface for experiment control      | Web interface built using HTML/CSS with backend Python scripts. Flask was used to integrate both.                            | Interface design can vary depending on the facility.                                                                                                                                                                               |
| Implement user and data management                   | Local server storage and user account management system. Python based excel management was used as a database in this study. | Can be implemented using database systems such as SQL                                                                                                                                                                              |
| Enable remote access to the platform                 | Ngrok-based secure tunnel connecting the local server to the internet                                                        | Other server hosting or VPN-based access systems can be used                                                                                                                                                                       |
| Prepare a blank microfluidic device                  | Glass-glass microfluidic chamber fabricated using spacer tape and UV-curable resin                                           | Optical transparency and gas impermeability are important for in-situ photopolymerization                                                                                                                                          |
| Upload device designs and initiate fabrication       | Design files (e.g., PNG or CAD-based patterns) uploaded through the web interface                                            | Designs are projected for in-situ photopolymerization inside the device                                                                                                                                                            |
| Capture experimental data                            | Camera-based video acquisition through Python control scripts                                                                | Data stored locally for later processing                                                                                                                                                                                           |
| Perform experimental data analysis                   | OpenPIV for particle image velocimetry and OpenCV-based particle tracking executed on the local server                       | Other analysis software may be integrated, depending on the experiment                                                                                                                                                             |
| Run remote experiments                               | Experiments are controlled through the web interface while hardware executes commands locally                                | Some preparatory steps (device loading and sample preparation) currently require in-lab assistance                                                                                                                                 |

## Supplementary movies

Supplementary movies can be found at the following link. [10.6084/m9.figshare.29144891](https://doi.org/10.6084/m9.figshare.29144891).

## References

- 1 Y. Zhang, M. Li, T.-M. Tseng and U. Schlichtmann, *Commun Eng*, 2024, **3**, 71.
- 2 J. J. Wietsma, J. T. van der Veen, W. Buesink, A. van den Berg and M. Odijk, *J. Chem. Educ.*, 2018, **95**, 267–275.
- 3 A. J. De Micheli, T. Valentin, F. Grillo, M. Kapur and S. Schuerle, *J. Chem. Educ.*, 2022, **99**, 1272–1279.
- 4 P. Delgado, C. A. Luna, A. Dissanayaka, O. Oshinowo, J. J. Waggoner, S. Schley, T. Fernandez and D. R. Myers, *Lab Chip*, 2024, **24**, 2176–2192.
- 5 T. Sano, M. J. N. Sampad, J. Gonzalez-Ferrer, S. Hernandez, S. Vera-Choqqeccota, P. A. Vargas, R. Urcuyo, N. Montellano Duran, M. Teodorescu, D. Haussler, H. Schmidt and M. A. Mostajo-Radji, *Sci Rep*, 2024, **14**, 14364.
